# Supplementary material for: LipoSVM: Prediction of Lysine Lipoylation in Proteins based on the Support Vector Machine
Source: PubMed Central journal article supplement — Curr Genomics. 2019 Aug;20(5):362–70. doi: 10.2174/1389202919666191014092843 (PMC7235397; doi:10.2174/1389202919666191014092843), 2019-08
Supplement: CG-20-362_SD1.pdf [file CG-20-362_SD1.pdf]

## Supplementary Material

### LipoSVM: Prediction of Lysine Lipoylation in Proteins based on the Support Vector Machine

Meiqi Wu<sup>1</sup>, Pengchao Lu<sup>2</sup>, Yingxi Yang<sup>3</sup>, Liwen Liu<sup>1</sup>, Hui Wang<sup>4</sup>, Yan Xu<sup>1</sup> and Jixun Chu<sup>1,\*</sup>

<sup>1</sup>Department of Applied Mathematics, University of Science and Technology Beijing, Beijing 100083, China; <sup>2</sup>Equipment Leasing Company of China Petroleum Pipeline Engineering Co., Ltd. 065000 Langfang City, Hebei Province, China; <sup>3</sup>Department of Chemical and Biological Engineering, Hong Kong University of Science and Technology, Hong Kong, China; <sup>4</sup>Institute of Computing Technology, Chinese Academy of Sciences, Beijing 100080, China

#### Supplementary S3. Detailed process of constructing PSSM.

To get information of sequential evolution, the position-specific scoring matrix<sup>1</sup> can be utilized. Let  $P$  and  $N$  represent the flanking regions of positive and negative samples,  $N^+$  and  $N^-$  represent the number of fragments in the positive and negative dataset, respectively.  $P_i$  is the  $i$ -th fragment in the positive dataset,  $P_{ij}$  is the  $j$ -th position in the  $i$ -th fragment. Then  $V_p^{j,a}$  which is a binary vector represents each symbol  $a$  from the 21 amino acids and each position in  $P$ .

$$V_p^{j,a} = (A_1, A_2, \dots, A_{N^+}) \quad (1)$$

where  $A_i$  can be calculated as following:

$$A_i = \begin{cases} 1 & P_{ij} = a \\ 0 & P_{ij} \neq a \end{cases} \quad (2)$$

For negative samples the vector  $V_N^{j,a}$  can be formed in the same way. A  $p$ -value for each set of  $V_p^{j,a}$  and  $V_N^{j,a}$  obtained via two-sample  $t$ -test<sup>2</sup>. Then, the following matrix  $V_{PSSM}$  constructed.

$$V_{PSSM} = \begin{bmatrix} V_{1,1} & V_{1,2} & \dots & V_{1,L} \\ V_{2,1} & V_{2,2} & \dots & V_{2,L} \\ \vdots & \vdots & \vdots & \vdots \\ V_{21,1} & V_{21,2} & \dots & V_{21,L} \end{bmatrix} \quad (3)$$

In this matrix,  $L$  is the length of the fragments.  $V_{i,j}$  denotes the  $p$ -value of the  $i$ -th amino acid in the  $j$ -th position for a given positive and negative dataset. By calculating the frequency of each amino acid in each position of the positive dataset, the following matrix  $F^P$  obtained.

$$F^P = \begin{bmatrix} F_{1,1}^P & F_{1,2}^P & \dots & F_{1,L}^P \\ F_{2,1}^P & F_{2,2}^P & \dots & F_{2,L}^P \\ \vdots & \vdots & \vdots & \vdots \\ F_{21,1}^P & F_{21,2}^P & \dots & F_{21,L}^P \end{bmatrix} \quad (4)$$

where  $F_{i,j}^P$  represents the frequency of the  $i$ -th amino acid in the  $j$ -th position and as is  $F^N$ . Finally, the following PSSM matrix is used for encoding.

$$M_{PSSM} = \begin{bmatrix} E_{1,1} & E_{1,2} & \dots & E_{1,L} \\ E_{2,1} & E_{2,2} & \dots & E_{2,L} \\ \vdots & \vdots & \vdots & \vdots \\ E_{21,1} & E_{21,2} & \dots & E_{21,L} \end{bmatrix} \quad (5)$$

where  $M_{i,j}$  can be calculated as following:

$$\delta_{i,j} = \frac{F_{i,j}^P - F_{i,j}^N}{V_{i,j}} \quad (6)$$

$$M_{i,j} = \begin{cases} \ln(|\delta_{i,j}| + 1) & \delta_{i,j} \geq 0 \\ -\ln(|\delta_{i,j}| + 1) & \delta_{i,j} < 0 \end{cases} \quad (7)$$

If  $M_{i,j} > 0$ , the probability that the  $i$ -th amino acid in the  $j$ -th position appears in the positive fragments is greater. Otherwise, it is more likely to be in the negative fragments.

## REFERENCES

1. Hasan, M. A. M.; Ahmad, S.; Molla, M. K. I., iMulti-HumPhos: a multi-label classifier for identifying human phosphorylated proteins using multiple kernel learning based support vector machines. *Mol Biosyst* **2017**, *13* (8), 1608-1618.
2. Vacic, V.; Iakoucheva, L. M.; Radivojac, P., Two Sample Logo: a graphical representation of the differences between two sets of sequence alignments. *Bioinformatics* **2006**, *22* (12), 1536-7.

## Supplementary S4. Pseudo codes of SMOTE algorithm.

## Pseudo code of SMOTE algorithm

Algorithm SMOTE ( $T, N, k$ )Input: Number of minority class examples  $T$ ; Amount of SMOTE  $N\%$ ; Number of nearest neighbors  $k$ .

1. (If  $N$  is less than 100%, randomize the minority class sample as only a random percent of them will be SMOTEd.)
  2. if  $N < 100$
  3. then Randomize the  $T$  minority class samples
  4.  $T = (N/100) * T$
  5.  $N = 100$
  6. end if
  7.  $N = (\text{int})N/100$
  8.  $k$  = Number of nearest neighbors
  9.  $\text{numattrs}$  = Number of attributes
  10.  $\text{Sample} [] []$ : array for original minority class samples
  11.  $\text{newindex}$ : keeps a count of number of synthetic samples generated, initialized to 0.
  12.  $\text{Synthetic} [] []$ : array for synthetic samples  
(Compute  $k$  nearest neighbors for each minority class sample only.)
  13. for  $i = 1: T$
  14. Compute  $k$  nearest neighbors for  $i$ , and save the indices in the  $\text{nnarray}$
  15. Populate ( $N, i, \text{nnarray}$ )
  16. end for
  - Populate ( $N, i, \text{nnarray}$ )
  17. while  $N \neq 0$
  18. Choose a random number between 1 and  $k$ , call it  $\text{nn}$ . This step chooses one of the  $k$  nearest neighbors of  $i$ .
  19. for  $\text{attr} = 1: \text{numattrs}$
  20.  $\text{dif} = \text{Sample}[\text{nnarray}[\text{nn}]][\text{attr}] - \text{Sample}[i][\text{attr}]$
  21.  $\text{gap} = \text{random number between 0 and 1}$
  22.  $\text{Synthetic}[\text{newindex}][\text{attr}] = \text{Sample}[i][\text{attr}] + \text{gap} * \text{dif}$
  23. endfor
  24.  $\text{newindex}++$
  25.  $N = N - 1$
  26. endwhile
- Output:  $(N/100) * T$  synthetic minority class samples
